# Supplementary material for: Fibrogenic Cell Plasticity Blunts Tissue Regeneration and Aggravates Muscular Dystrophy
Source: PubMed Central journal article supplement — Stem Cell Reports. 2015 May 14;4(6):1046–60. doi: 10.1016/j.stemcr.2015.04.007 (PMC4472037; doi:10.1016/j.stemcr.2015.04.007), 2015-05-14
Supplement: mmc1.pdf [file mmc1.pdf]

**Stem Cell Reports, Volume 4**

**Supplemental Information**

## **Fibrogenic Cell Plasticity Blunts Tissue**

## **Regeneration and Aggravates Muscular Dystrophy**

**Patrizia Pessina, Yacine Kharraz, Mercè Jardí, So-ichiro Fukada, Antonio L. Serrano,  
Eusebio Perdiguero, and Pura Muñoz-Cánoves**

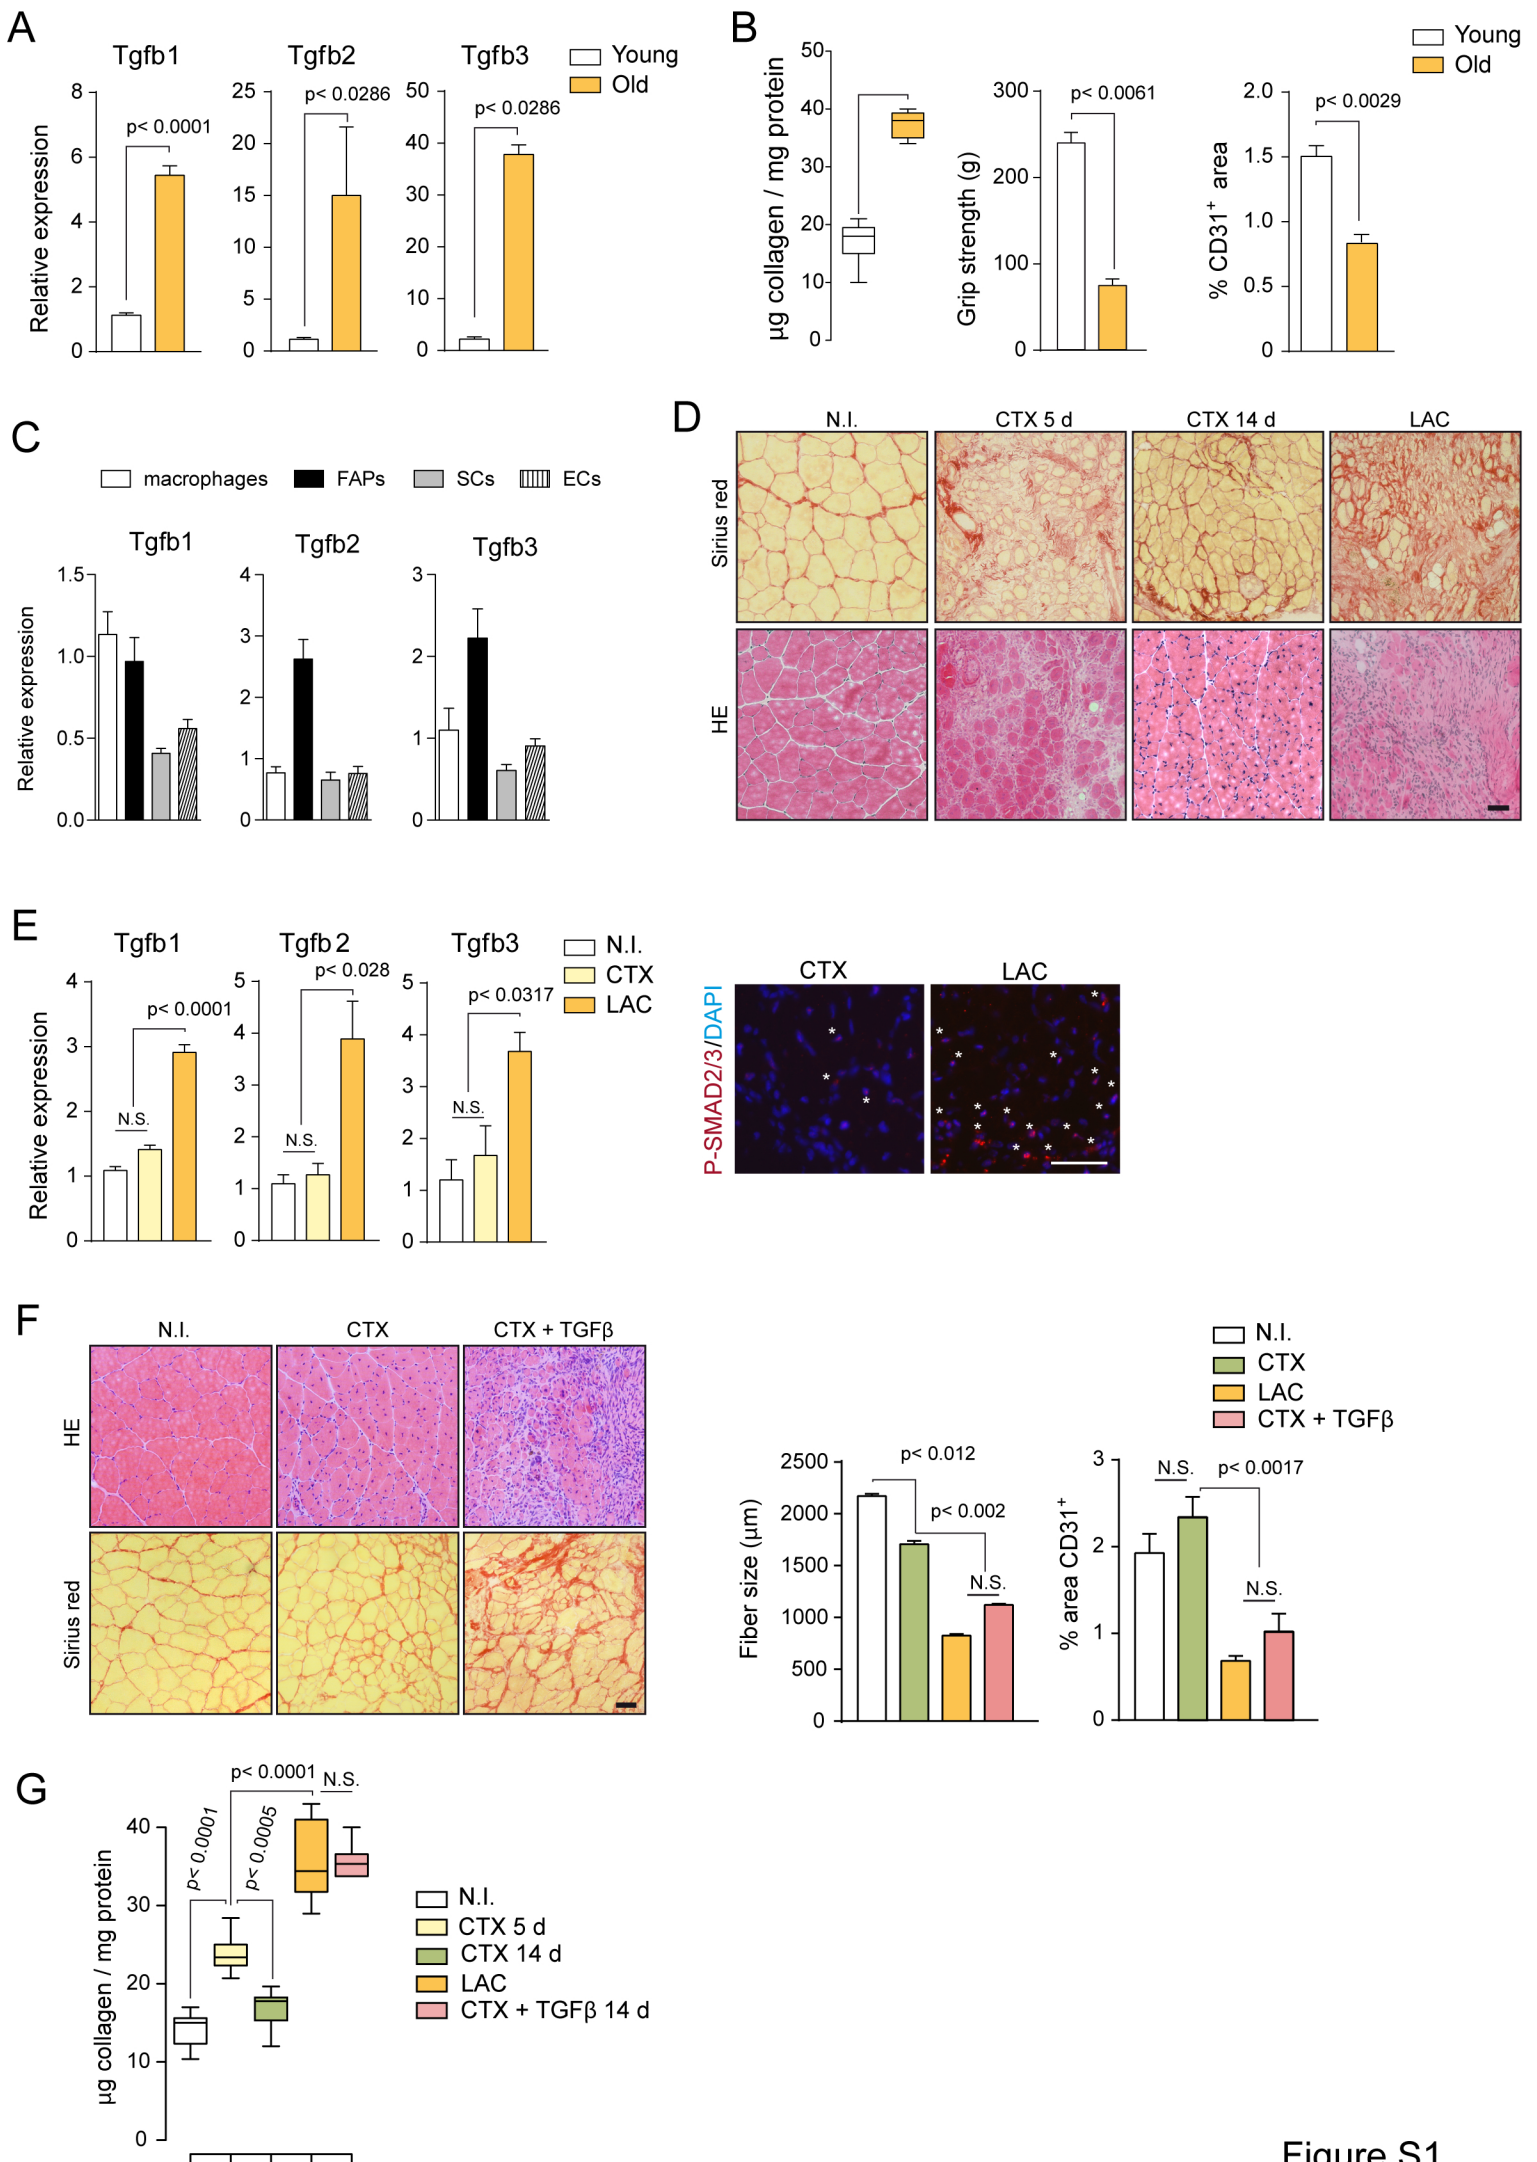

Figure S1

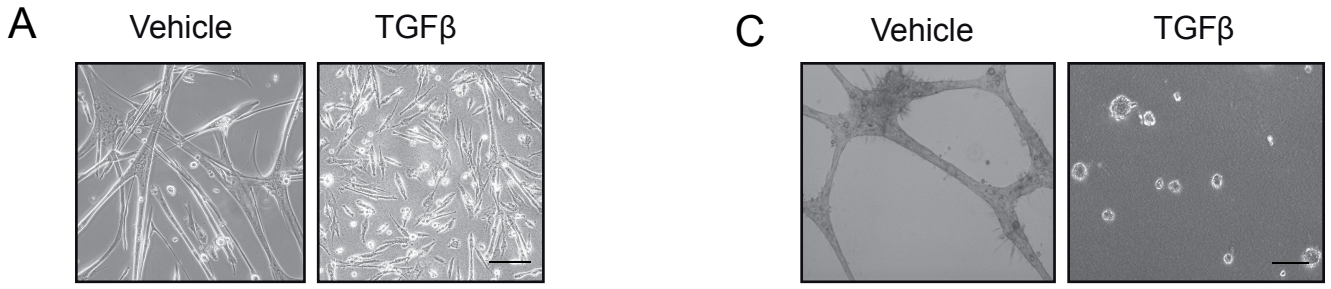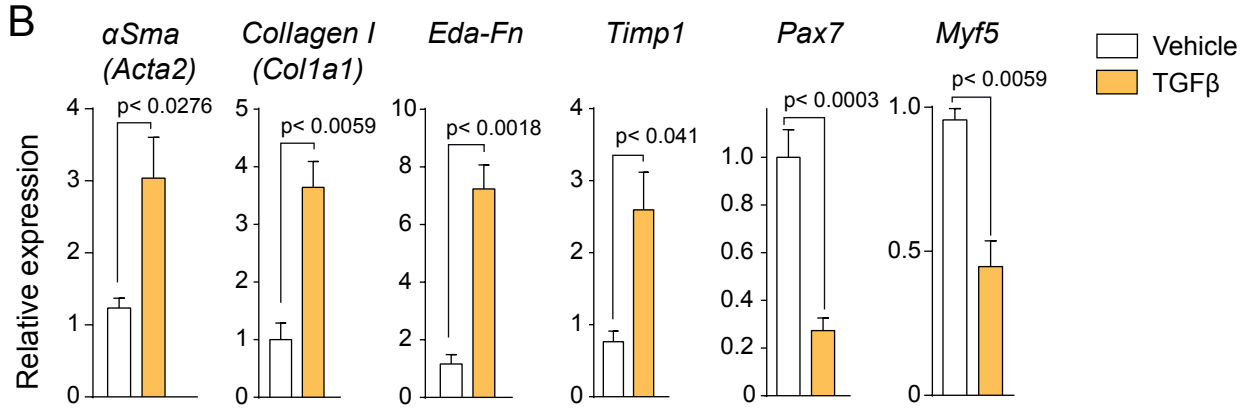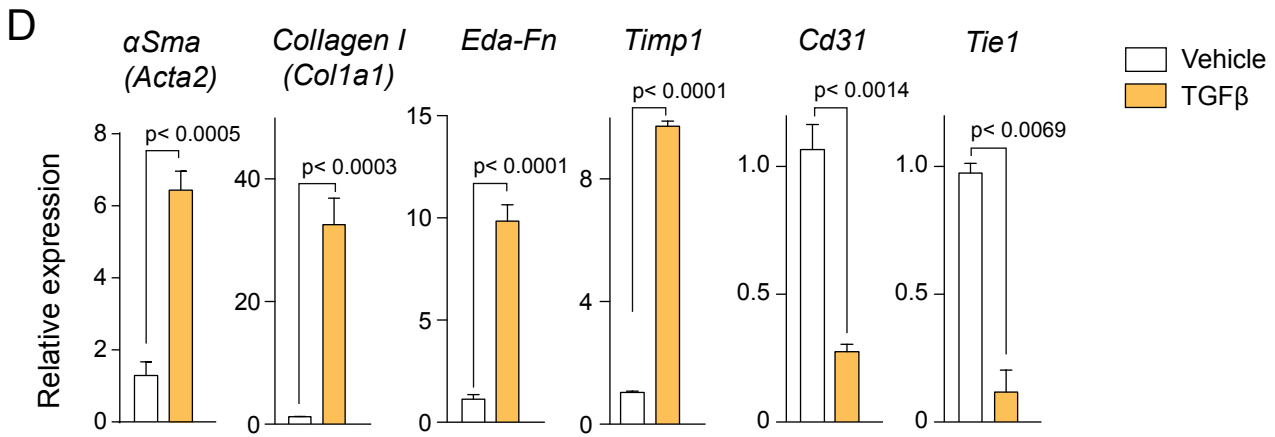

Figure S2

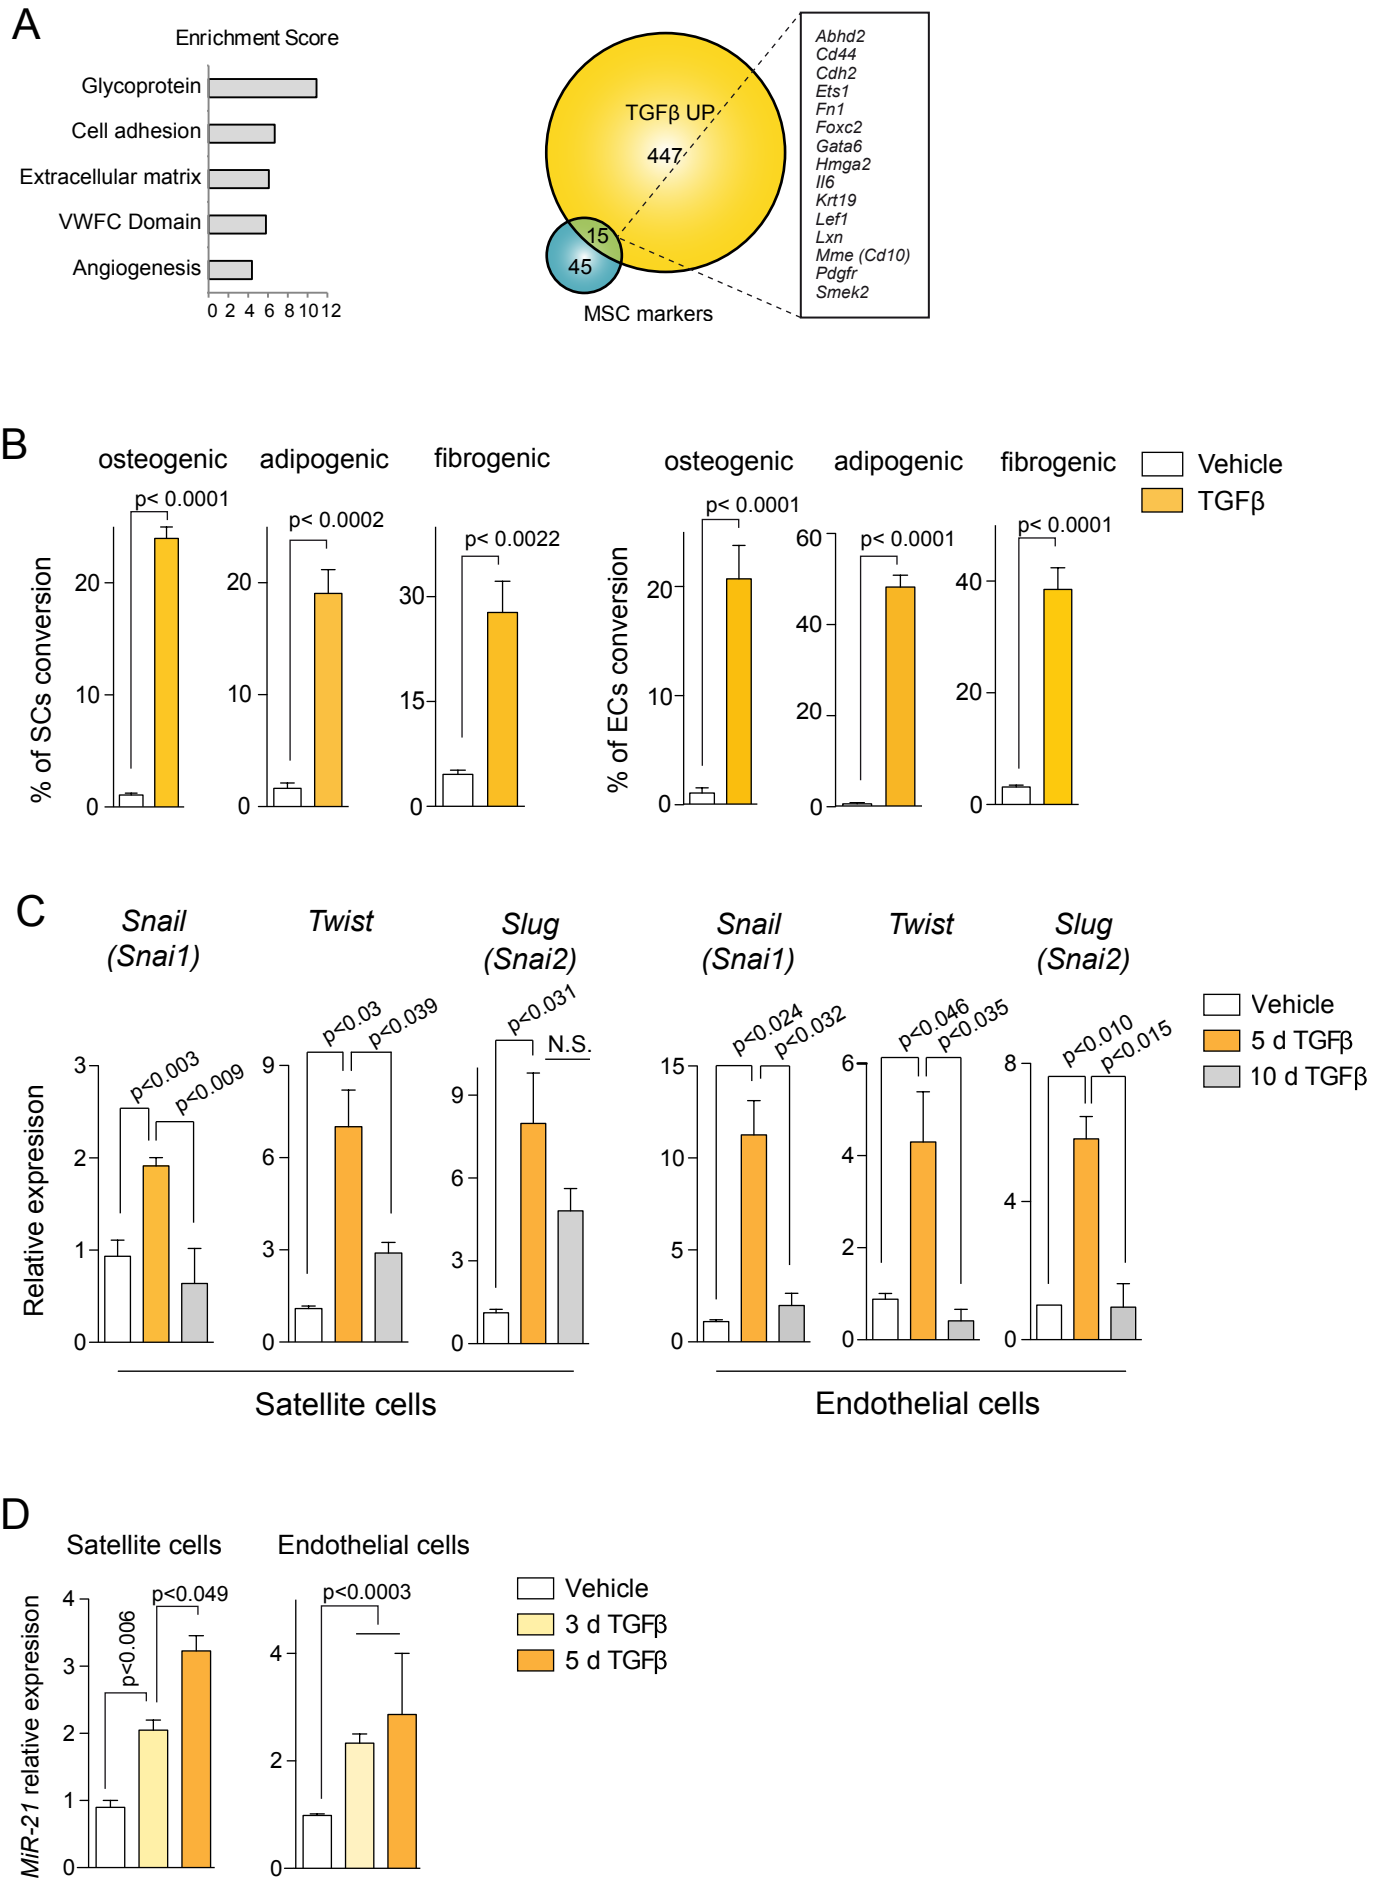

Figure S3

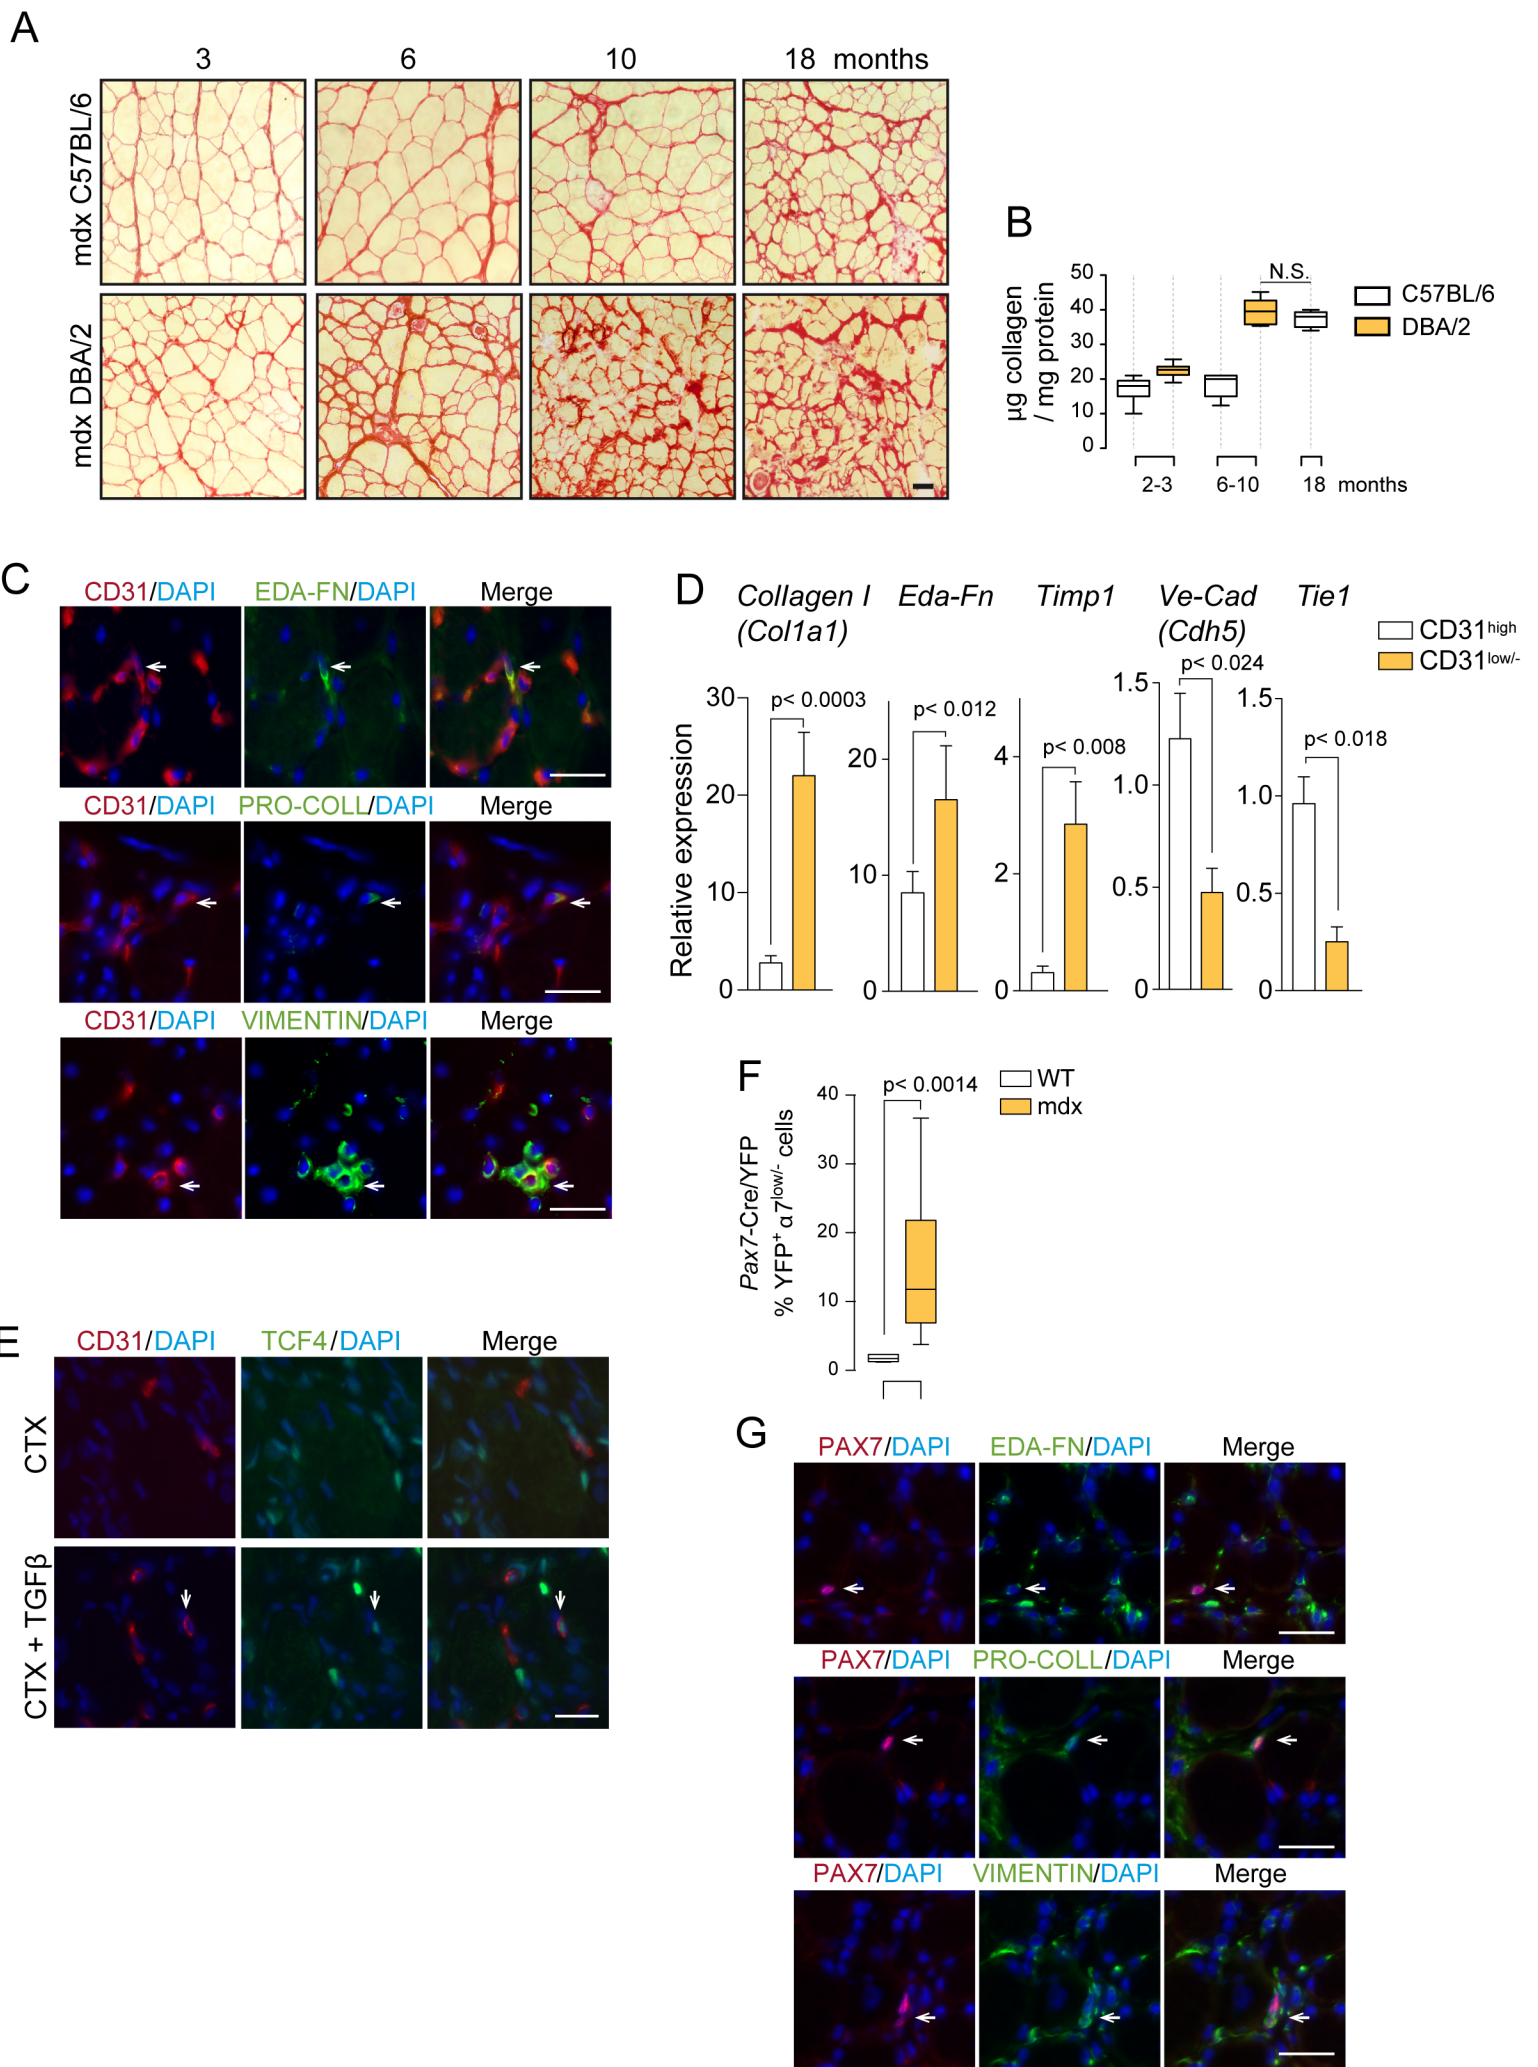

Figure S4

**A**

| % of collagen-producing cells in mdx dystrophic muscle |             |
|--------------------------------------------------------|-------------|
| Endothelial origin                                     | 2.01 ± 0.36 |
| Myogenic origin                                        | 2.24 ± 0.43 |
| Hematopoietic origin                                   | 2.85 ± 0.60 |

**B**

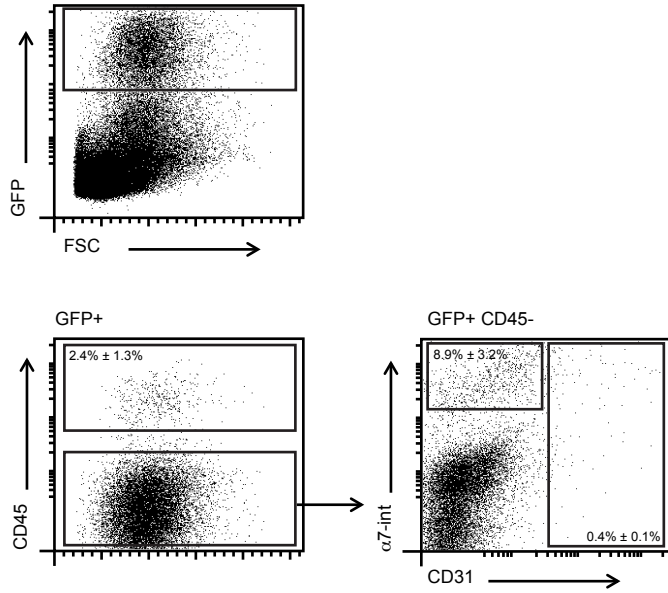

**C**

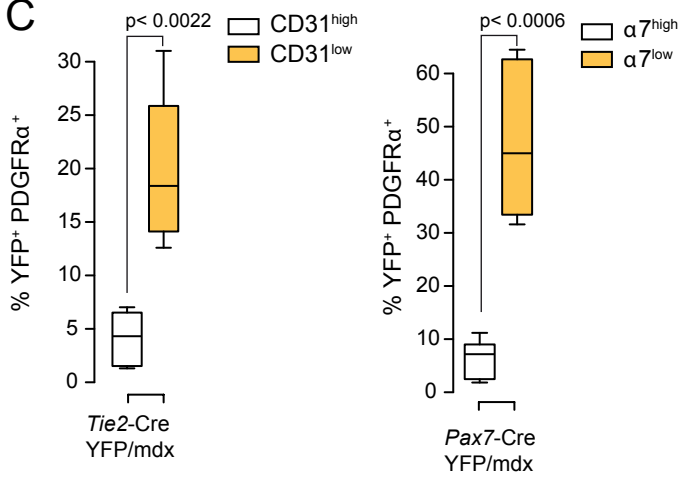

**D**

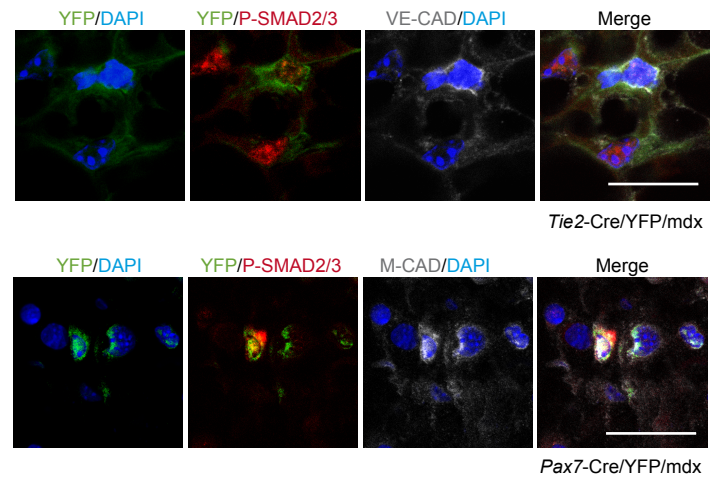

**E**

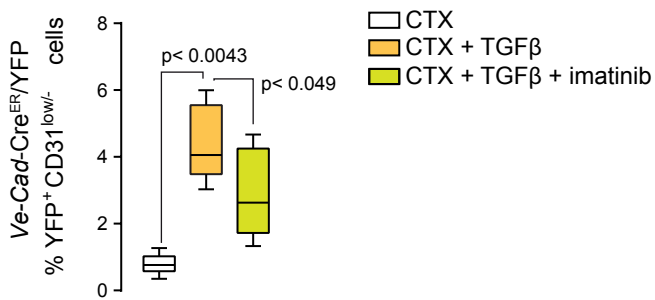

**F**

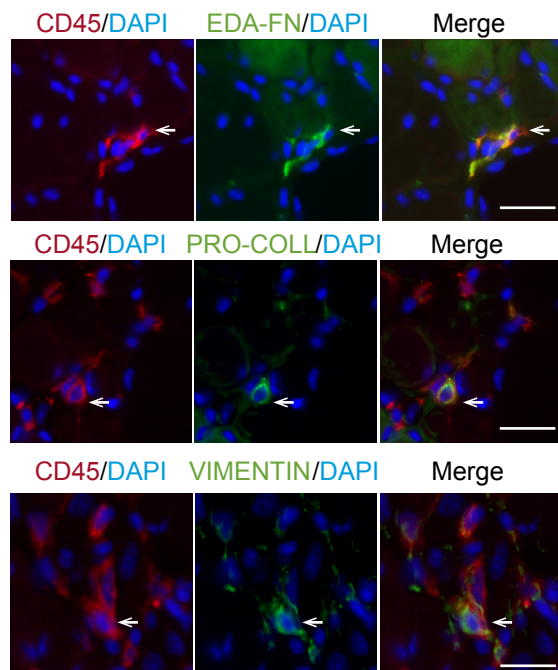

### Supplemental Figure 1

(A) Quantitative RT-PCR for *Tgfb1*, 2 and 3 mRNA expression in limb muscles from young (2-3 months) and old (18-24 months) mdx mice in C57BL/6 background. Values are mean  $\pm$  SEM; n=4 for each group. Unpaired t test was used for comparison. (B) collagen content (as fibrosis index), four-limb grip strength and area occupied by CD31-positive cells (angiogenesis index) of young and old mdx mice, described in (A). Values are mean  $\pm$  SEM; n=7 for each group. Non-parametric Mann–Whitney U-test was used for comparison. (C) Quantitative RT-PCR for *Tgfb1*, 2 and 3 mRNA expression in FACS-isolated macrophages, fibroadipogenic progenitors (FAPs), satellite cells and endothelial cells, isolated from fibrotic muscle of mdx mice. Values are mean  $\pm$  SEM; n=3 independent experiments (mice) for each group. Unpaired t test was used for comparison. (D) Representative Sirius Red and HE staining pictures of tibialis anterior (TA) muscles of wild-type (WT) mice non-injured (N.I.) or injured with cardiotoxin (CTX) after 5 and 14 days, or injured by laceration (LAC) after 21 days. (E) Quantitative RT-PCR for *Tgfb1*, 2 and 3 mRNA expression in muscles of WT mice after 14 days of CTX injury or 21 days of laceration. Values are mean  $\pm$  SEM; n=4 independent experiments (mice) for each group. Unpaired t test was used for comparison. Representative pictures of phosphorylated SMAD2/3 (P-SMAD2/3) protein immunostaining in CTX- and LAC-injured muscle. \* shows P-SMAD2/3 positive cells. (F) Representative HE and Sirius red staining pictures of TA muscles of WT mice non-injured or injured with CTX for 7 days, after which TGF $\beta$  was administered (or vehicle) for 7 extra days, and muscles were collected at 14 days post injury (CTX+TGF $\beta$ ) to induce more persistent fibrosis. Quantification of size of regenerating fibers is represented. Quantification of area occupied by CD31-positive cells, as an angiogenesis index. Values are mean  $\pm$  SEM. (G) Quantification of collagen content for the same muscles: non injured (N.I.) muscle, muscle at 5 and 14 days after CTX injury, 14 days after CTX+TGF $\beta$  injury, or 21 days after laceration. Values are mean  $\pm$  SEM; n=9 independent experiments (mice) or each group. Non-parametric Mann–Whitney U-test was used for comparison. Scale bars, 50  $\mu$ m.

### Supplemental Figure 2

(A,C) Satellite cells (A) and endothelial cells (C) (obtained from muscle of WT mice) were cultured in vitro in adequate medium to induce formation of myotubes or angiotubes (as an indication of their functionality), respectively, and treated or not with TGF $\beta$  for 10 days. Scale bars, 50  $\mu$ m. (B,D) Quantitative RT-PCR in primary satellite cells (B) and endothelial cells (D) treated with TGF $\beta$  for 10 days in vitro. Fibrogenic markers are up-regulated upon treatment, and myogenic markers (*Myf5* and *Pax7* (B)) or endothelial markers (*Cd31* and *Tie1* (D)) are down-regulated. Values are mean  $\pm$  SEM; n=3 independent experiments. Unpaired t test was used for comparison.

### Supplemental Figure 3

(A) Functional annotation analysis of the Gene Ontology (GO) was performed in DAVID to identify biological processes enriched in TGF $\beta$ -treated satellite cells (n=3 samples). The top annotation clusters are shown according to their enrichment score. Names are based on enriched GO annotations. Venn diagram of the overlap between significantly upregulated genes in TGF $\beta$ -treated satellite cells and multipotent progenitor cell-specific transcripts. (B) Quantification of conversion of TGF $\beta$ -pretreated satellite cells and endothelial cells into the three indicated cellular destinies. Values are mean  $\pm$  SEM; n=4 biological replicates. Unpaired t test was used for comparison. (C) Quantitative RT-PCR analysis of classical transcription factors regulating mesenchymal transitions in satellite cells and endothelial cells treated with TGF $\beta$  for 5 and 10 days (or vehicle, 10 days). Values are mean  $\pm$  SEM; n=3 independent experiments. Unpaired t test was used for comparison. (D) Satellite cells and endothelial cells were treated with TGF $\beta$  for 3 and 5 days (or vehicle, 5 days) and analyzed for *MiR-21*

expression. Values are mean  $\pm$  SEM; n=3 independent experiments. Unpaired t test was used for comparison.

#### Supplemental Figure 4

(A) Representative Sirius Red staining pictures of TA muscle of mdx/C57/BL6 and mdx/DBA2 mice at the indicated ages. Scale bars, 50  $\mu$ m. (B) Quantification of collagen content of the same muscles. Data correspond to the mean  $\pm$  SEM; n=5 for each group. Non-parametric Mann–Whitney U-test was used for comparison. (C) Representative pictures of cells co-expressing the endothelial cell marker CD31 and EDA FIBRONECTIN (EDA-FN) (upper panel), PRO-COLLAGEN (PRO-COL) (central panel) or VIMENTIN (lower panel) in TA muscle of old (18 months) mdx mice. Scale bars= 25  $\mu$ m. (D) Quantitative RT-PCR in FACS-isolated YFP<sup>+</sup>CD31<sup>low/-</sup> cells compared to the YFP<sup>+</sup>CD31<sup>high</sup> population, isolated from CTX/TGF $\beta$ -injured muscle of *Ve-Cad-Cre<sup>ER</sup>/YFP* mice, for the indicated fibroblastic and endothelial cell markers. Values are mean  $\pm$  SEM; n=3 independent experiments (mice) for each group. Unpaired t test was used for comparison. (E) Representative pictures of cells co-expressing TCF4 and CD31 in CTX-injured muscle compared to CTX/TGF $\beta$ -injured muscles from WT mice. Nuclei are stained with DAPI. Scale bars= 10  $\mu$ m. (F) Quantification of YFP<sup>+</sup> cells that maintain or have reduced/lost  $\alpha$ 7-INTEGRIN expression in limb muscles of old (18 months of age) *Pax7-Cre/YFP/mdx* mice (C57BL/6 background) (mdx) compared to *Pax7-Cre/YFP* (WT) mice. Values are mean  $\pm$  SEM; n=6 animals for each group. Non-parametric Mann–Whitney U-test was used for comparison. (G) Representative pictures of cells co-expressing the myogenic marker PAX7 and EDA-FN (upper panel), PRO-COL (central panel) and VIMENTIN (lower panel) in TA muscle of old mdx mice. Scale bars, 25  $\mu$ m.

#### Supplemental Figure 5

(A) Table showing the percentage of collagen-producing cells from endothelial, myogenic and hematopoietic origin in dystrophic muscle at advanced disease stages. The percentages of collagen-producing cells derived from the different origins analyzed are the mean of different experimental procedures which are described in detail in the Methods section. In particular, see “**Analysis of distinct origins of collagen-producing cells**”: for endothelial origin (procedures 1, 2, 3 and 4); for myogenic origin (procedures 1, 3 and 4); and for hematopoietic origin (procedures 2, 3 and 4). Values are mean  $\pm$  SEM. (B) Representative FACS plots of CD45<sup>+</sup>COLL<sup>+</sup> cells,  $\alpha$ 7INTEGRIN<sup>+</sup>COLL<sup>+</sup> cells and CD31<sup>+</sup>COLL<sup>+</sup> cells in fibrotic muscle of *Coll-GFP/mdx* mice, representing cells with hematopoietic, myogenic and endothelial cell origin, respectively, within the fibrogenic (collagen-expressing) population. Values are mean  $\pm$  SEM; n=5 for each group. Note: results from panel (B) are included in the mean values shown in the table in panel (A). (C) Percentage of double positive PDGFR $\alpha$ <sup>+</sup> YFP<sup>+</sup> cells from muscles of *Tie2-Cre/YFP/mdx* (that were CD31<sup>high</sup> or CD31<sup>low</sup>) and *Pax7-Cre/YFP/mdx* mice (that were  $\alpha$ 7-INTEGRIN<sup>high</sup> or  $\alpha$ 7-INTEGRIN<sup>low</sup>). Values are mean  $\pm$  SEM relative to age-matched lineage tracing mice in non-dystrophic backgrounds; n=6 animals for each group. Non-parametric Mann–Whitney U-test was used for comparison. (D) Top: Representative immunostaining picture of YFP<sup>+</sup> cells co-expressing VE-CADHERIN (endothelial cell marker) and P-SMAD2/3 in TA muscle of *Tie2-Cre/YFP/mdx* mice of 18 months of age. Bottom: Representative immunostaining picture of YFP<sup>+</sup> cells co-expressing M-CADHERIN (satellite cell marker) and P-SMAD2/3 in TA muscle of *Pax7-Cre/YFP/mdx* mice of 18 months of age. Scale bars= 25  $\mu$ m. (E) Muscles of *Ve-Cad-Cre<sup>ER</sup>/YFP* mice were injured with CTX, or CTX/TGF $\beta$ , in mice that were treated or not with the PDGFR $\alpha$  inhibitor imatinib (as indicated in Materials and Methods). The number of YFP<sup>+</sup> cells that had lost endothelial cell marker expression (CD31<sup>low/-</sup>) was quantified. Values are mean  $\pm$  SEM; n=3



independent experiments (mice) for each group. Unpaired t test was used for comparison. **(F)** Representative pictures of cells co-expressing the hematopoietic CD45 and EDA-FN (upper panel), PRO-COL (central panel) and VIMENTIN (lower panel) in TA muscle of old mdx mice. Scale bars, 25  $\mu$ m.

**Table 1**  
**Antibodies list**

|                                     |                                    |
|-------------------------------------|------------------------------------|
| TCF4                                | Cell Signaling 2569S               |
| Vimentin                            | Sigma V5255                        |
| Fibronectin (IST-9)                 | Abcam ab6328-250                   |
| Pro-COL1A1( E-9)                    | Santa Cruz Biotechnology sc-133179 |
| Mouse collagen Type I               | Millipore AB765P                   |
| Actin $\alpha$ -Smooth Muscle - SMA | Sigma A2547                        |
| Phospho - Smad2 (Ser465/467)        | Cell Signalling 3101S              |
| CD31                                | BD Pharmingen 550274               |
| CD45                                | BD Pharmingen 553081               |
| Pax7                                |                                    |
| M-Cadherin                          | Santa Cruz Biotechnology sc-6470   |
| VE-Cadherin                         | Santa Cruz Biotechnology sc-6458   |
| GFP                                 | Invitrogen A6455                   |
| human CD56                          | BD Pharmingen 556325               |
| human vWF                           | Abcam ab68545                      |
| Biotin anti human CD45              | Biologend 304003                   |
| human CD44                          | Binding Site MC114                 |

**Table 2**  
**FACS antibodies list**

|                                                    |                     |
|----------------------------------------------------|---------------------|
| PE-conjugated anti- $\alpha$ 7-integrin            | (Ablab AB10STMW215) |
| PE-Cy7-conjugated anti-CD31                        | Biolegend 102418    |
| APC-Cy7-cojugated anti-CD45                        | Biolegend 103116    |
| APC-conjugated anti-Mouse CD140a (PDGF Receptor a) | eBioscience 17-1401 |
| Brilliant Violet 605 Ly-6A/E (Sca-1)               | Biolegend 108133    |

**Table 3**  
**Primers list**

**Mouse primers**

|                  | <b>Forward</b>         | <b>Reverse</b>          |
|------------------|------------------------|-------------------------|
| L7               | GAAGCTCATCTATGAGAAGGC  | AAGACGAAGGAGCTGCAGAAC   |
| $\alpha$ SMA     | TCCCTGGAGAAGAGCTACGA   | CTTCTGCATCCTGTCAGCAA    |
| Collagen I       | GGTATGCTTGATCTGTATCTGC | AGTCCAGTTCTTCATTGCATT   |
| ED-A Fibronectin | AGGACTGGCATTCACTGATGTG | GTCACCCTGTACCTGGAAACTTG |
| Vimentin         | CGGCTGCGAGAGAAATTGC    | CCACTTTCCGTTCAAGGTCAAG  |
| CTGF             | CAGGCTGGAGAAGCAGAGTCGT | CTGGTGCAGCCAGAAAGCTCAA  |
| TIMP-1           | TTCCAGTAAGGCCTGTAGC    | TTATGACCAGGTCCGAGTT     |
| TGF $\beta$ 1    | CTCCACCTGCAAGACCAT     | CTTAGTTTGGACAGGATCTGG   |
| TGF $\beta$ 2    | TCGACATGGATCAGTTTATGCG | CCCTGGTACTGTTGTAGATGGA  |
| TGF $\beta$ 3    | GAAATGGGTCCACGAACC     | TCCAAGCACCGTGCTATGG     |
| Snail            | CACACGCTGCCTTGTGTCT    | GGTCAGCAAAAGCACGGTT     |
| CD31             | ACGCTGGTGCTCTATGCAAG   | TCAGTTGCTGCCCATTCATCA   |
| Tie1             | CAGGCACAGCAGGTTGTAGA   | GTGCCACCATTTTGACACTG    |
| Ve-Cadherin      | CCGCTGATCGGCACTGTGGT   | GGAGTACCCGATGCTGCGCT    |
| Pax7             | GTGTCTCCAAGATTCTGTGCCG | CAATCTTTTTTCTCCACATCCGG |
| Myf5             | CTGTCTGGTCCCGAAAGAAC   | AAGCAATCCAAGCTGGACAC    |
| PDGFR $\alpha$   | TGGCATGATGGTTCGATTCTA  | CGCTGAGGTGGTAGAAGGAG    |
| Fibronectin I    | GCGACTCTGACTGGCCTTAC   | CCGTGTAAGGGTCAAAGCAT    |
| LEF1             | CAGCTTTATCCAGGCTGGTC   | TGAAGTCGACTCCTGTAGCTTCT |
| IL-6             | GGTGACAACCACGGCCTTCCC  | AAGCCTCCGACTTGTGAAGTGGT |
| HMGA2            | GAGCCCTCTCCTAAGAGACCC  | TTGGCCGTTTTTCTCCAATGG   |
| CD10             | GAAATTCAGCCAAAGCAAGC   | TGCTGAGCACTGAAGAATGG    |
| CD14             | AAAGAACTGAAGCCTTTC     | AGCAACAAGCCAAGCACAC     |
| CD29             | TGGACAATGTCACCTGGAAA   | TGTGCCCACTGCTGACTTAG    |
| CD44             | TGGATCCGAATTAGCTGGAC   | AGCTTTTTTCTTCTGCCACA    |
| CD71             | TAAATCCCCGTTGTTGAGG    | TTTTCTGCAGCAGCTCTTGA    |
| CD90             | CGCTCTCCTGCTCTCAGTCT   | GCACGTGCTTCCTCTTCTCT    |
| CD105            | CTTCCAAGGACAGCCAAGAG   | TTCTGGCAAGCACAAAGAATG   |

**Human primers**

|                | <b>Forward</b>          | <b>Reverse</b>         |
|----------------|-------------------------|------------------------|
| GAPDH          | ACCACAGTCCATGCCATCAC    | TCCACCACCCTGTTGCTGT    |
| Collagen I     | GCAAGGTGTTGTGCGATGAC    | TTGGTCGGTGGGTGACTCTG   |
| FN I           | GGATGACAAGGAAAATAGCCCTG | GAACATCGGTCACTTGCATCT  |
| CTGF           | CAAGGGCCTCTTCTGTGACT    | ACGTGCACTGGTACTTGCAG   |
| TIMP-1         | CTTCTGCAATTCCGACCTCGT   | CCCTAAGGCTTGGAAACCCTTT |
| TGF $\beta$ 1  | GGCCAGATCCTGTCCAAGC     | GTGGGTTTCCACCATTAGCAC  |
| Pax7           | GACCCCTGCCTAACCACATC    | GTCTCCTGGTAGCGGCAAAG   |
| Myf5           | GAGGTGTACCACGACCAACC    | CCTGCTCTCTCAGCAACTCC   |
| MyoD           | GCCACAACGGACGACTTCTATG  | TGCTCTTCGGGTTTCAGGAG   |
| PDGFR $\alpha$ | TCCTCTGCCTGACATTGACC    | TGAAGGTGGAAGTCTGGAAC   |

## **EXPERIMENTAL PROCEDURES**

### **Mice handling and sample obtention**

Mice were housed in standard cages under 12 hour light-dark cycles and fed ad libitum with a standard chow diet. All experiments were approved by the Ethics Committee of the Pompeu Fabra University (UPF) and performed according to Spanish and European legislation. Operations were performed after injection intra-peritoneal of ketamine/metomidine anesthesia (50 mg/kg and 1 mg/kg body weight). Atipamezol (1.0 mg/kg body weight) by subcutaneous injection was used to reverse the effects of anesthesia. Injections were made using 25 gauge needles (Becton Dickinson). Mice were sacrificed at the indicated ages by cervical dislocation and the tissues were immediately processed to avoid artifacts, either by direct freezing in liquid nitrogen for protein and RNA extraction or as described below for histological analysis.

### **Histological analysis and immunohistochemistry**

Cryosections (10  $\mu$ m thickness) were stained with hematoxylin/eosin (H&E) or Sirius red (Sigma-Aldrich). Quantification of collagen content in muscle was performed according to Ardite et al. (Ardite et al., 2012). Briefly, 10 cryosections were collected in a tube and were sequentially incubated with a solution containing 0.1% Fast green in saturated picric acid, washed with distilled water, incubated with 0.1% Fast green and 0.1% Sirius red in saturated picric acid, washed with distilled water, and gently resuspended in a solution of 0.1 M NaOH in absolute methanol (1 vol:1 vol). Absorbance was measured in a spectrophotometer at 540 and 605 nm wavelengths and used to calculate total protein and collagen.

For immunohistochemistry, muscles were fixed in 2% PFA for two hours at 4°C, then the tissue was transferred to 20% sucrose PBS and incubated overnight for subsequent OCT embedding and freezing. Standard methods were followed for cryosectioning. Tissue sections were permeabilized in 0.5% Triton X- 100 (Sigma) in PBS, and blocked for 1 h at room temperature in PBS containing 10% normal goat serum (NGS) and 10% bovine serum albumin (BSA). Cells were stained overnight at 4°C using a primary antibody diluted in 10% NGS and 10% BSA. The primary antibodies used for immunofluorescence are listed on Table 1 of Supplemental Information. Primary antibodies were detected using secondary antibodies conjugated to Alexa 488, 568 or 647 (Molecular Probes) and nuclei were stained with DAPI (Invitrogen). After washing, tissue sections were mounted with Mowiol.

Dystrophic patients study: Human samples from DMD patients were provided by Biobanco Hospital Virgen del Rocío (Sevilla) and from Hospital Sant Joan de Deu (Barcelona). Muscle biopsies were obtained from the vastus lateralis muscle under local anesthesia (2% lidocaine). A portion of the muscle tissue was directly frozen in melting isopentane and stored at -80°C until analyzed. DMD diagnosis was established on a total absence of dystrophin by immunohistochemistry and Western blotting. Morphological quantification of fibrosis was carried out by color image segmentation and automatic measurement using Fiji image analysis software. The ratio of the total area of fibrosis to the total biopsy area was used to estimate the extent of fibrosis (fibrosis index).

### **Cell analysis by Flow Cytometry**

Skeletal muscle from both hind limbs was carefully dissected and then gently torn with tissue forceps until homogeneous. Enzymatic digestion was performed with Collagenase D 0.1% (Roche) and Dispase II 0.05% (Sigma-Aldrich) at 37° C for 25 min four times. Preparations were passed through a 40- $\mu$ m cell strainer (Becton Dickinson),

and washed. Resulting single cells were collected by centrifugation at 400g for 5 min. Cell preparations were incubated with primary antibodies against cell membrane markers for 30 min at 4 °C in supplemented PBS containing 2 mM EDTA and 2% FBS (FACS buffer) at  $\sim 1 \times 10^7$  cells per ml. The antibodies used in flow cytometry and the dilutions are listed on Table 2 of Supplemental Information. Analysis was performed on LSRII (Becton Dickinson) equipped with three lasers. Data were collected using FACSDIVA software. Sorting were performed on a FACS Aria (Becton Dickinson), equipped with three lasers. Sorting gates were strictly defined based on isotype control (fluorescence minus one) stains. Flow cytometry data analysis was performed using Gate Logic software.

### **RNA isolation, reverse transcription (RT) and real-time quantitative PCR**

Total RNA was isolated from muscle tissue using Trizol (Invitrogen). cDNA was synthesized from 1  $\mu$ g of total RNA using the First Strand cDNA Synthesis kit and random priming according to the manufacturer's instructions (Promega). RT-PCR was performed on a LightCycler 480 System using LightCycler 480 SYBR green I Master mix (Roche) with 10  $\mu$ M each primer and normalized to L7 ribosomal RNA as a housekeeping gene. The primers used are listed on Table 3 of Supplemental Information.

### **Quantification of miR expression**

Total RNA, including the miR fractions, was isolated using the miRNeasy kit (QIAGEN). The quantification of *MiR-21* was performed using Taqman assays for miR (Applied Biosystems) and Taqman Universal Master Mix (Applied Biosystems). miR levels were quantified using *MiR- U6B* as the housekeeping miR.

### **Transcriptomic analysis**

cDNA generated from RNA obtained from murine primary myoblasts, treated (or not) for 4 days with TGF $\beta$ 1, was used on a transcriptome analysis by Agilent SurePrint G3 Mouse GE 8  $\times$  60K high-density microarray slides, performed at the microarray Unit of CRG/UPF. Microarray analysis was performed with 3 samples per condition. Data were normalized using cyclic loess, and differentially expressed genes were identified using AFM 4.0 for all pairwise comparisons. Gene ontology analysis was performed using DAVID. Venn diagrams were generated using BioVenn.

To compare with our data, we generated a curated list of mesenchymal progenitor cell-specific transcripts by combining a list of well-known mesenchymal-stem cell markers with a list of genes found to be expressed selectively in mesenchymal stem cells as compared to fibroblasts, osteoblasts, chondrocytes and adipocytes and which showed reduced expression upon differentiation to any of those lineages (Kubo et al., 2009)

### **Quantification of TGF $\beta$ protein**

The protein concentration of active and total (active plus latent) TGF $\beta$  levels in dystrophic muscle was quantified by ELISA (Promega), following the manufacturer's instructions.

## Analysis of distinct origins of collagen-producing cells

The percentage of collagen-producing cells derived from distinct cellular origins was calculated using different experimental procedures:

1- Percentage of YFP<sup>+</sup> cells within the fibroblastic population (defined by TCF4 and FIBRONECTIN markers). Analysis was performed by immunofluorescence in muscle sections of *Ve-Cad-Cre<sup>ER</sup>/YFP/mdx*, *Tie2-Cre/YFP/mdx*, *Pax7-Cre<sup>ER</sup>/YFP/mdx* mice and in mdx mice transplanted with bone marrow from *Coll-GFP* mice.

2- Percentage of YFP<sup>+</sup> cells in the collagen-expressing population (as an indicator of fibrogenic population). Collagen production was detected by intracellular staining by FACS analysis in cells obtained from dystrophic muscle of *Ve-Cad-Cre<sup>ER</sup>/YFP/mdx*, *Ve-Cad-Cre<sup>ER</sup>/YFP* and *Pax7-Cre<sup>ER</sup>/YFP* mice and mdx mice transplanted with *Coll-GFP* bone marrow.

3- Percentage of  $\alpha$ 7INTEGRIN<sup>+</sup>, CD31<sup>+</sup> and CD45<sup>+</sup> cells (reporting myogenic, endothelial and hematopoietic cell origins, respectively) within the GFP<sup>+</sup> population. FACS analysis was used to analyze  $\alpha$ 7INTEGRIN<sup>+</sup>, CD31<sup>+</sup> and CD45<sup>+</sup> cells in GFP<sup>+</sup> cells from muscle of *Coll-GFP/mdx* mice.

4- Percentage of PAX7<sup>+</sup>, VE-CADHERIN<sup>+</sup> or CD45<sup>+</sup> cells (reporting myogenic, endothelial and hematopoietic cell origins, respectively) within the fibroblastic population (defined by TCF4 and VIMENTIN markers). Analysis was performed by immunofluorescence in muscle sections of mdx mice.

**Table: mouse models used to determine origins of fibroblasts**

| Sources of fibroblasts | Dystrophic muscle                                                              |
|------------------------|--------------------------------------------------------------------------------|
| Endothelial cells      | <i>Ve-Cad-Cre<sup>ER</sup>/YFP</i> mice crossed with DBA/2 mdx mice            |
|                        | <i>Tie2-Cre/YFP</i> mice crossed with C57BL/6 mdx mice                         |
| Myogenic cells         | <i>Pax7-Cre<sup>ER</sup>/YFP</i> mice crossed with DBA/2 mdx mice              |
|                        | <i>Pax7-Cre/YFP</i> mice crossed with C57BL/6 mdx mice                         |
| Hematopoietic cells    | Transplantation of bone marrow from <i>Coll-GFP</i> mice into C57BL/6 mdx mice |

| Sources of fibroblasts | WT muscle: acute injury/TGF $\beta$ |
|------------------------|-------------------------------------|
| Endothelial origin     | <i>Ve-Cad-Cre<sup>ER</sup>/YFP</i>  |
| Myogenic origin        | <i>Pax7-Cre<sup>ER</sup>/YFP</i>    |

| Fate mapping mouse    | Dystrophic muscle                               |
|-----------------------|-------------------------------------------------|
| <i>Coll-GFP/DBA/2</i> | CD31, marker for endothelial origin             |
|                       | $\alpha$ 7 INTEGRIN, marker for myogenic origin |
|                       | CD45, marker for hematopoietic origin           |

## Muscle force measurement

Four-limb grip strength was determined as previously described (Ardite et al., 2012). The mice were allowed to grasp a piece of wire gauze by the forelimbs, and then steadily pulled by the tail horizontally away until the grip was detached. The maximal force values were recorded. Five such trials were undertaken for each mouse within 2 min.

### **Digital image acquisition and processing**

Digital images were acquired using: (1) an upright microscope DMR6000B (Leica) equipped with a DFC300FX camera for immunohistochemical color pictures and a Hamamatsu ORCA-ER camera for immunofluorescence pictures; (2) confocal images of muscle sections or isolated satellite cells were taken using a Leica SPE confocal laser scanning microscope system. HCX PL Fluotar 10×/0.30, 20×/0.50 and 40×/0.75 objectives were used. Acquisition was performed using Leica Application or LAS AF software (Leica). Images were composed and edited in Photoshop CS5 (Adobe), where background was reduced using brightness and contrast adjustments applied to the whole image.
